# Supplementary material
Source: PubMed Central journal article supplement (PMC5550323)
Supplement: mmc1.pdf [file mmc1.pdf]

**Biophysical Journal, Volume 113**

**Supplemental Information**

**SMIT1 Modifies KCNQ Channel Function and Pharmacology by Physical Interaction with the Pore**

**Rían W. Manville, Daniel L. Neverisky, and Geoffrey W. Abbott**

|                                      | Peak Current,<br>+40 mV ( $\mu$ A) | $\tau$ act, -40 mV<br>(ms)       | $\tau$ deact,<br>-30 mV (ms)  | G/Gmax (mV)                     | Slope (mV)                  | TEA IC <sub>50</sub><br>(mM)   |
|--------------------------------------|------------------------------------|----------------------------------|-------------------------------|---------------------------------|-----------------------------|--------------------------------|
| Q1                                   | 1.79 $\pm$ 0.2<br>(n = 97)         | 1137.4 $\pm$ 20<br>(n = 97)      | 572.6 $\pm$ 39<br>(n = 97)    | -25.4 $\pm$ 1.1<br>(n = 97)     | 14.1 $\pm$ 1.1<br>(n = 97)  | 29.3 $\pm$ 0.1<br>(n = 5)      |
| Q1-S1                                | 1.88 $\pm$ 0.2<br>(n = 102)        | 1189.1 $\pm$ 89<br>(n = 102)     | 550.6 $\pm$ 75<br>(n = 102)   | -27.0 $\pm$ 1.5<br>(n = 102)    | 14.6 $\pm$ 1.4<br>(n = 102) | 121 $\pm$ 0.09<br>(n = 5) **** |
| Q1/E1                                | 11.40 $\pm$ 0.8<br>(n = 100)       | 4251.1 $\pm$ 347<br>(n = 12)     | 2006.5 $\pm$ 186<br>(n = 12)  | -12.4 $\pm$ 3.7<br>(n = 12)     | 11.2 $\pm$ 3.3<br>(n = 12)  | 95 $\pm$ 0.25<br>(n = 4)       |
| Q1/E1-S1                             | 6.53 $\pm$ 0.8<br>(n = 90) ****    | 7166.7 $\pm$ 632<br>(n = 12) *** | 1496.3 $\pm$ 83<br>(n = 12) * | 5.1 $\pm$ 2.6<br>(n = 12) ****  | 14.8 $\pm$ 2.5<br>(n = 12)  | 103 $\pm$ 0.06<br>(n = 5) **** |
| Q1/E3                                | 1.01 $\pm$ 0.1<br>(n = 13)         | n.d.                             | n.d.                          | -40.8 $\pm$ 1.3<br>(n = 13)     | 9.57 $\pm$ 1.2<br>(n = 13)  | n.d.                           |
| Q1/E3-S1                             | 1.08 $\pm$ 0.2<br>(n = 13)         | n.d.                             | n.d.                          | -47.8 $\pm$ 1.0<br>(n = 13) *** | 10.1 $\pm$ 0.8<br>(n = 13)  | n.d.                           |
| Q2                                   | 1.31 $\pm$ 0.2<br>(n = 32)         | 695.4 $\pm$ 25<br>(n = 32)       | 428 $\pm$ 17<br>(n = 32)      | -37.5 $\pm$ 2.3<br>(n = 32)     | 17.9 $\pm$ 2.1<br>(n = 32)  | n.d.                           |
| Q2-S1                                | 1.05 $\pm$ 0.1<br>(n = 29)         | 638.9 $\pm$ 20<br>(n = 29)       | 507.3 $\pm$ 31<br>(n = 29)    | -44.2 $\pm$ 3.3<br>(n = 29)     | 11.7 $\pm$ 2.8<br>(n = 29)  | n.d.                           |
| Q2/Q3                                | 4.08 $\pm$ 0.4<br>(n = 13)         | 1067.3 $\pm$ 117<br>(n = 13)     | 354.5 $\pm$ 32<br>(n = 13)    | -30.7 $\pm$ 1.4<br>(n = 13)     | 9.4 $\pm$ 1.1<br>(n = 13)   | 6.9 $\pm$ 0.5<br>(n = 5)       |
| Q2/Q3-S1                             | 4.81 $\pm$ 0.9<br>(n = 10)         | 585.5 $\pm$ 36<br>(n = 10) **    | 331.7 $\pm$ 42<br>(n = 10)    | -37.9 $\pm$ 0.7<br>(n = 10) *** | 6.9 $\pm$ 0.9<br>(n = 10)   | 28.6 $\pm$ 0.4<br>(n = 5) **** |
| Q2/Q3<br>(100 mM K <sup>+</sup> )    | n.d.                               | n.d.                             | n.d.                          | -49.91 $\pm$ 2.9<br>(n = 11)    | 11.2 $\pm$ 2.3<br>(n = 11)  | n.d.                           |
| Q2/Q3-S1<br>(100 mM K <sup>+</sup> ) | n.d.                               | n.d.                             | n.d.                          | -56.36 $\pm$ 1.08<br>(n = 11)   | 10.6 $\pm$ 0.8<br>(n = 11)  | n.d.                           |
| Kv1.1                                | 2.43 $\pm$ 0.28<br>(n = 13)        | n.d.                             | n.d.                          | -16.9 $\pm$ 1.7<br>(n = 13)     | 15.5 $\pm$ 1.7<br>(n = 13)  | n.d.                           |
| Kv1.1-S1                             | 1.78 $\pm$ 0.3<br>(n = 13)         | n.d.                             | n.d.                          | -13.5 $\pm$ 1.0<br>(n = 13)     | 17.6 $\pm$ 1.2<br>(n = 13)  | n.d.                           |

**Table 1. KCNQ channel functional parameters  $\pm$  KCNE1, KCNE3, SMIT1.**

Statistics versus same channel in absence of SMIT1: \*\*\*\*p<0.0001, \*\*\*p=0.0008, \*\*p=0.0015, \*p=0.02, n.d., not determined. Bath solution contained 4 mM K<sup>+</sup> unless otherwise indicated. Abbreviations: E, KCNE; Q, KCNQ; S1, SMIT1; TEA, tetraethylammonium.

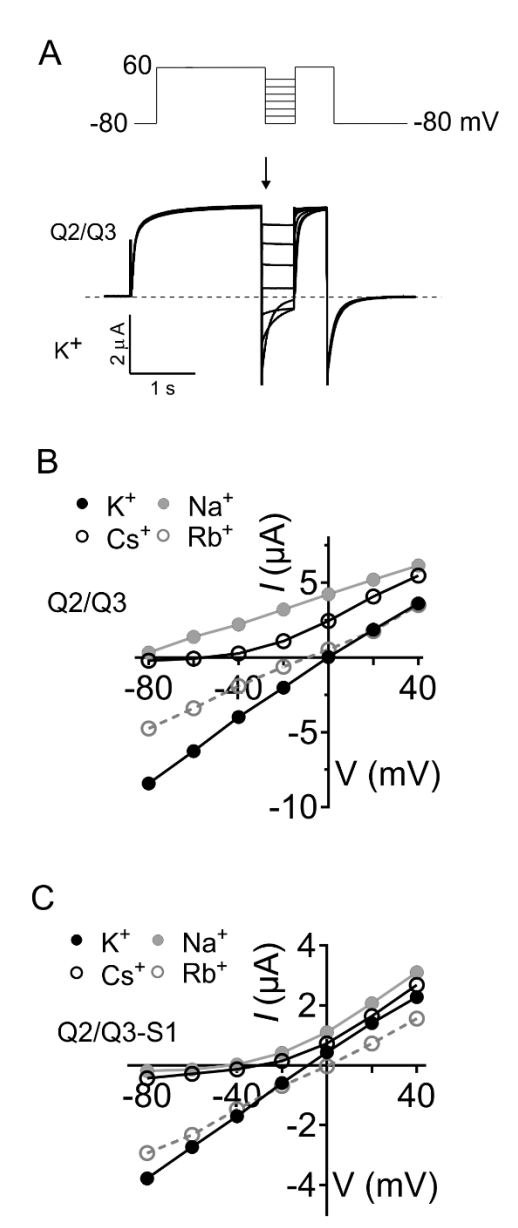

**Supplementary Figure 1. The effect of SMIT1 on KCNQ2/3 ion selectivity is not removed by phlorizin**

A. Representative traces from two-electrode voltage-clamp recordings of *Xenopus laevis* oocytes injected with cRNA encoding KCNQ2/3 in 100 mM K<sup>+</sup> and 500 μM phlorizin (voltage protocol inset. 1 s pulse to 60 mV followed by a 500-ms inactivation recovery step to voltages between -80 and 40 mV, then a 500-ms -80 mV tail pulse).

B. Mean current-voltage relationship for KCNQ2/3 alone in 100 mM K<sup>+</sup> (black circles), Cs<sup>+</sup> (open circles) and Na<sup>+</sup> (grey circles) and 500 μM phlorizin, *n* = 13-14.

C. Mean current-voltage relationship for KCNQ2/3 in combination with SMIT1 100 mM K<sup>+</sup> (black circles), Cs<sup>+</sup> (open circles) and Na<sup>+</sup> (grey circles) and 500 μM phlorizin, *n* = 13-14.

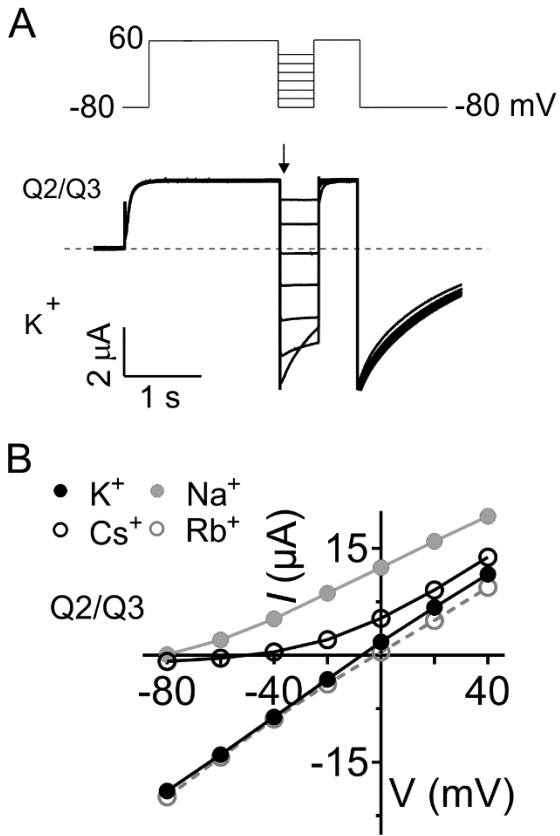

**Supplementary Figure 2. The effect of SMIT1 on KCNQ2/Q3 ion selectivity is not mimicked by retigabine**

- A. Representative traces from two-electrode voltage-clamp recordings of *Xenopus laevis* oocytes injected with cRNA encoding KCNQ2/3, in a bath solution containing 100 mM K<sup>+</sup> with 10 μM retigabine (voltage protocol inset. 1 s pulse to 60 mV followed by a 500-ms inactivation recovery step to voltages between -80 and 40 mV, then a 500-ms -80 mV tail pulse).
- B. Mean current-voltage relationship for KCNQ2/3 alone in 100 mM K<sup>+</sup> (black circles), Cs<sup>+</sup> (open circles) and Na<sup>+</sup> (grey circles) and 10 μM retigabine, *n* = 8. See Fig. 3 F for corresponding selectivity series.

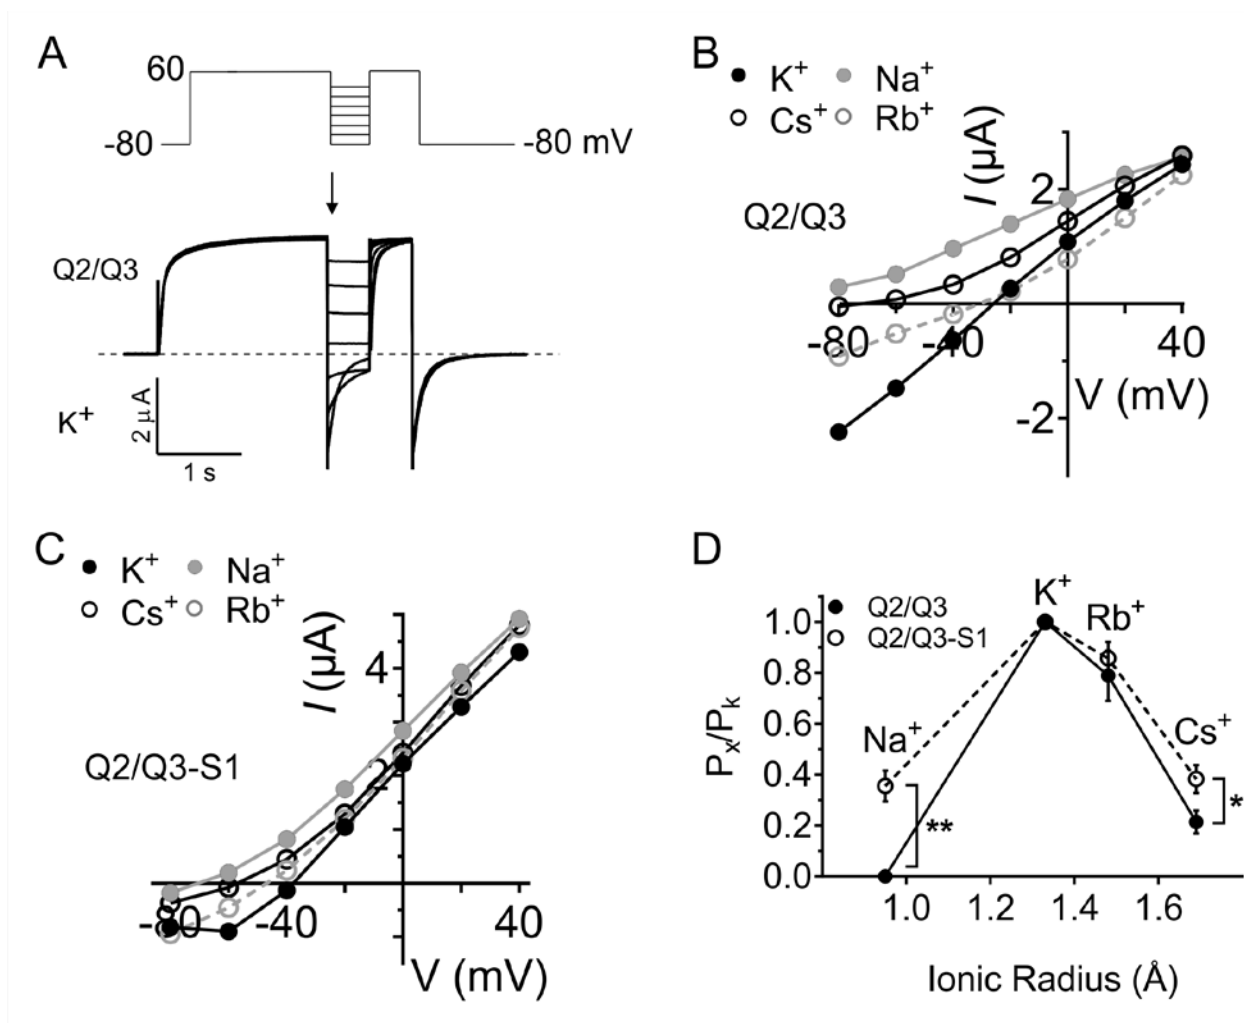

**Supplementary Figure 3. SMIT1 alters KCNQ2/Q3 ion selectivity using 15 mM bath permeant ions**

A. Representative traces from two-electrode voltage-clamp recordings of *Xenopus laevis* oocytes injected with cRNA encoding KCNQ2/3 in 15 mM K<sup>+</sup> (voltage protocol inset. 1 s pulse to 60 mV followed by a 500-ms inactivation recovery step to voltages between -80 and 40 mV, then a 500-ms -80 mV tail pulse).

B. Mean current-voltage relationship for KCNQ2/3 alone in 15 mM K<sup>+</sup> (black circles), Cs<sup>+</sup> (open circles) and Na<sup>+</sup> (grey circles),  $n = 6$ .

C. Mean current-voltage relationship for KCNQ2/3 in combination with SMIT1 15 mM K<sup>+</sup> (black circles), Cs<sup>+</sup> (open circles) and Na<sup>+</sup> (grey circles),  $n = 6$ .

D. Estimated mean permeability relative to that of K<sup>+</sup> versus ionic radius (Pauling) for Na<sup>+</sup>, Rb<sup>+</sup>, and Cs<sup>+</sup> through KCNQ2/Q3 (solid circles) and KCNQ2/Q3+SMIT1 (open circles, dotted lines) channels,  $n = 6$ . Error bars indicate SEM. Statistical significance for comparison of relative permeability of Na<sup>+</sup>: \*\* $p < 0.002$ , Cs<sup>+</sup> \* $p < 0.03$ . Values for relative permeability ratios, in the order Na<sup>+</sup>, Rb<sup>+</sup>, and Cs<sup>+</sup>: KCNQ2/Q3, 0, 0.76, and 0.21; KCNQ2/Q3+SMIT1, 0.36, 0.85, and 0.38.

100 mM  $[K^+]_o$

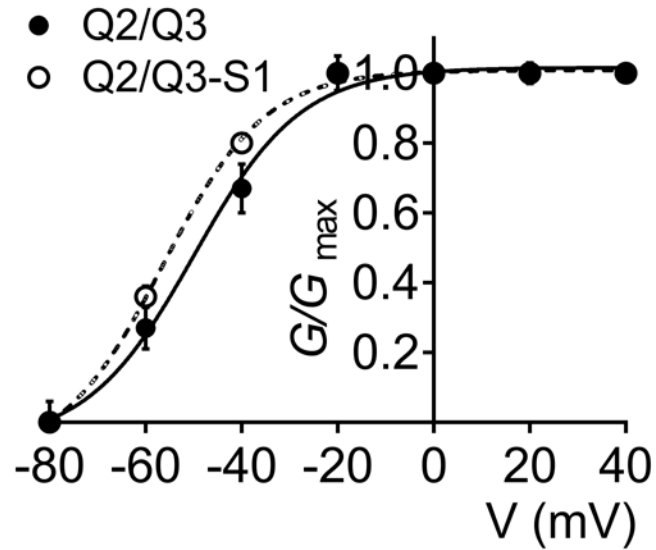

**Supplementary Figure 4. SMIT1 negative-shifts KCNQ2/Q3 activation in 100 mM  $[K^+]_o$**

Mean normalized tail current (at -30 mV) versus prepulse potential for *Xenopus laevis* oocytes injected with cRNA encoding KCNQ2/Q3, alone or co-injected with cRNA encoding SMIT1,  $n = 11$ . Error bars indicate SEM.

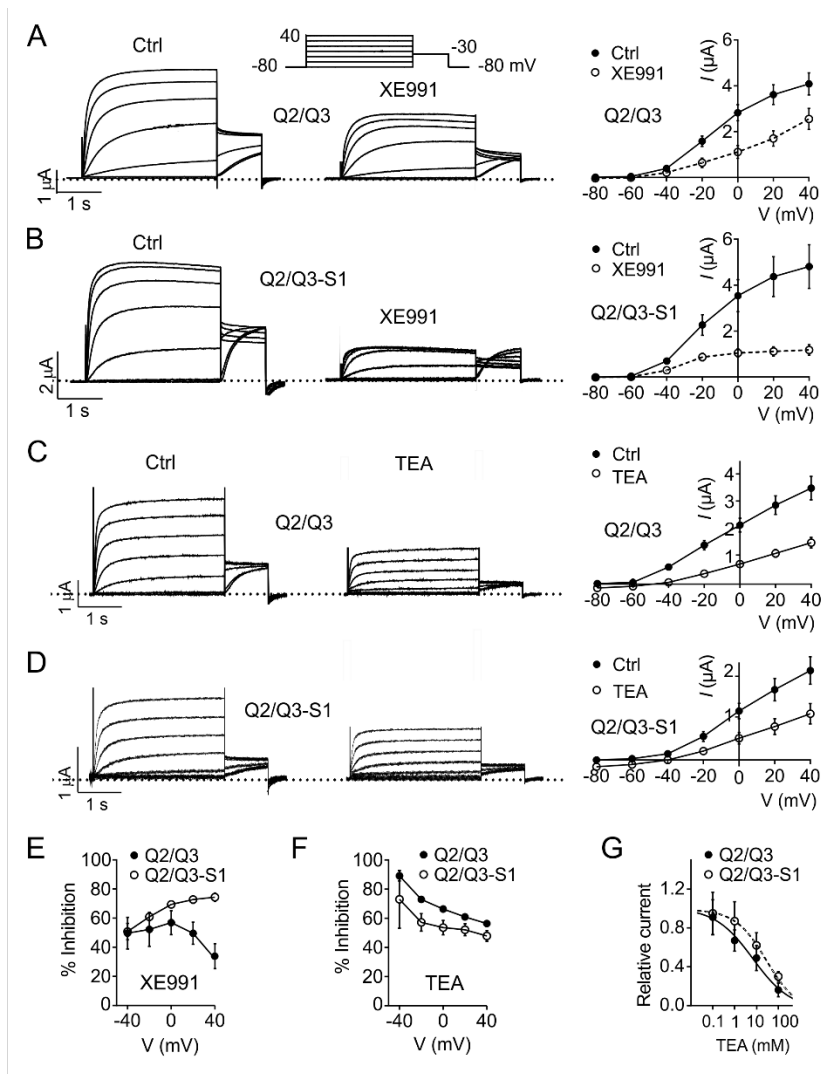

### Supplementary Figure 5. SMIT1 alters KCNQ2/Q3 pharmacology

**A.** *Left*, representative traces from two-electrode voltage-clamp recordings of *Xenopus laevis* oocytes injected with cRNA encoding KCNQ2/3 in ND96 or 50  $\mu$ M XE991. *Right*, mean current-voltage relationship for subunit combinations as in panel A,  $n = 13$ . Error bars indicate SEM.

**B.** *Left*, representative traces from two-electrode voltage-clamp recordings of *Xenopus laevis* oocytes co-injected with cRNA encoding KCNQ2/3 and SMIT1 in ND96 or 50  $\mu$ M XE991. *Right*, mean current-voltage relationship for subunit combinations as in panel A,  $n = 10$ . Error bars indicate SEM.

**C.** *Left*, representative traces from two-electrode voltage-clamp recordings of *Xenopus laevis* oocytes injected with cRNA encoding KCNQ2/3 in ND96 or 100 mM TEA. *Right*, mean current-voltage relationship for subunit combinations as in panel A,  $n = 13$ . Error bars indicate SEM.

**D.** *Left*, representative traces from two-electrode voltage-clamp recordings of *Xenopus laevis* oocytes co-injected with cRNA encoding KCNQ2/3 and SMIT1 in ND96 or 100 mM TEA. *Right*, mean current-voltage relationship for subunit combinations as in panel A,  $n = 6$ . Error bars indicate SEM.

**E.** Mean % inhibition (50  $\mu$ M XE991) versus voltage for KCNQ2/3 with or without SMIT1;  $n = 10$ -13. Error bars indicate SEM.

**F.** Mean % inhibition (100 mM TEA) versus voltage for KCNQ2/3 with or without SMIT1;  $n = 6$ . Error bars indicate SEM.

**G.** TEA dose response for KCNQ2/3 with or without SMIT1;  $n = 5$ . Error bars indicate SEM.

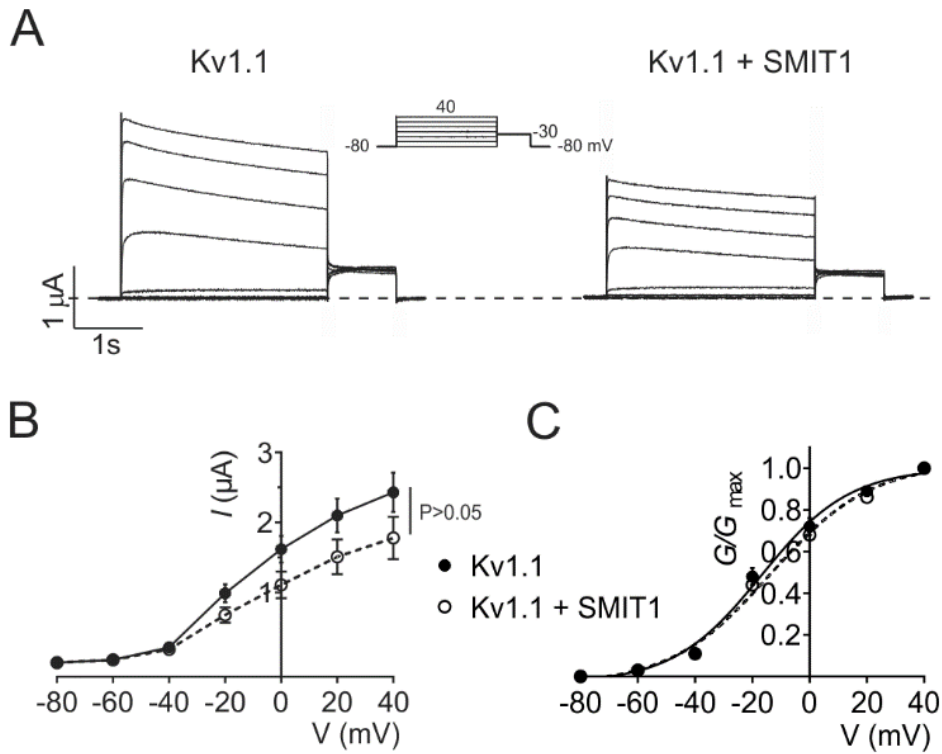

**Supplementary Figure 6. SMIT1 does not alter Kv1.1 activity**

A. Representative traces from two-electrode voltage-clamp recordings of *Xenopus laevis* oocytes injected with cRNA encoding Kv1.1, alone or co-injected with cRNA encoding SMIT1,  $n = 8-13$ .

B. Mean current-voltage relationship for subunit combinations as in panel A,  $n = 8-13$ . Error bars indicate SEM.

C. Mean normalized tail current (at -30 mV) versus prepulse potential for oocytes as in panel A,  $n = 8-13$ . Error bars indicate SEM.



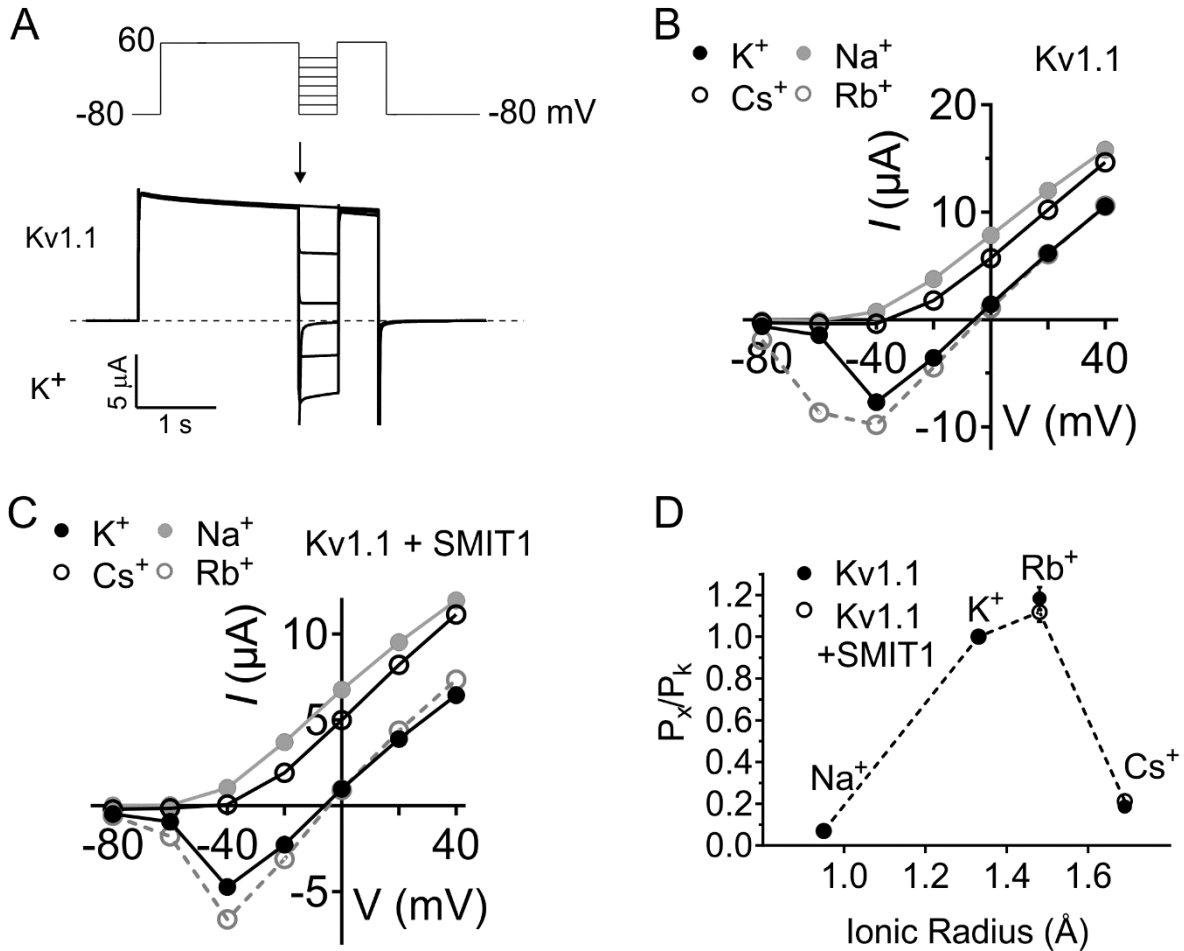

**Supplementary Figure 7. SMIT1 does not alter Kv1.1 ion selectivity**

A. Representative traces from two-electrode voltage-clamp recordings of *Xenopus laevis* oocytes injected with cRNA encoding Kv1.1 in 100 mM K<sup>+</sup> (voltage protocol inset. 1 s pulse to 60 mV followed by a 500-ms inactivation recovery step to voltages between -80 and 40 mV, then a 500-ms -80 mV tail pulse).

B. Mean current-voltage relationship for Kv1.1 alone in 100 mM K<sup>+</sup> (black circles), Cs<sup>+</sup> (open circles) and Na<sup>+</sup> (grey circles),  $n = 12$ .

C. Mean current-voltage relationship for Kv1.1 in combination with SMIT1 100 mM K<sup>+</sup> (black circles), Cs<sup>+</sup> (open circles) and Na<sup>+</sup> (grey circles),  $n = 12$ .

D. Estimated mean permeability relative to that of K<sup>+</sup> versus ionic radius (Pauling) for Na<sup>+</sup>, Rb<sup>+</sup>, and Cs<sup>+</sup> through Kv1.1 alone (solid circles) or when co-expressed with SMIT1 (open circles, dotted lines) channels,  $n = 12-14$ . Error bars indicate SEM. Values for relative permeability ratios, in the order Na<sup>+</sup>, Rb<sup>+</sup>, and Cs<sup>+</sup>: Kv1.1, 0.07, 1.18, and 0.18; Kv1.1+SMIT1, 0.07, 1.11, and 0.18.

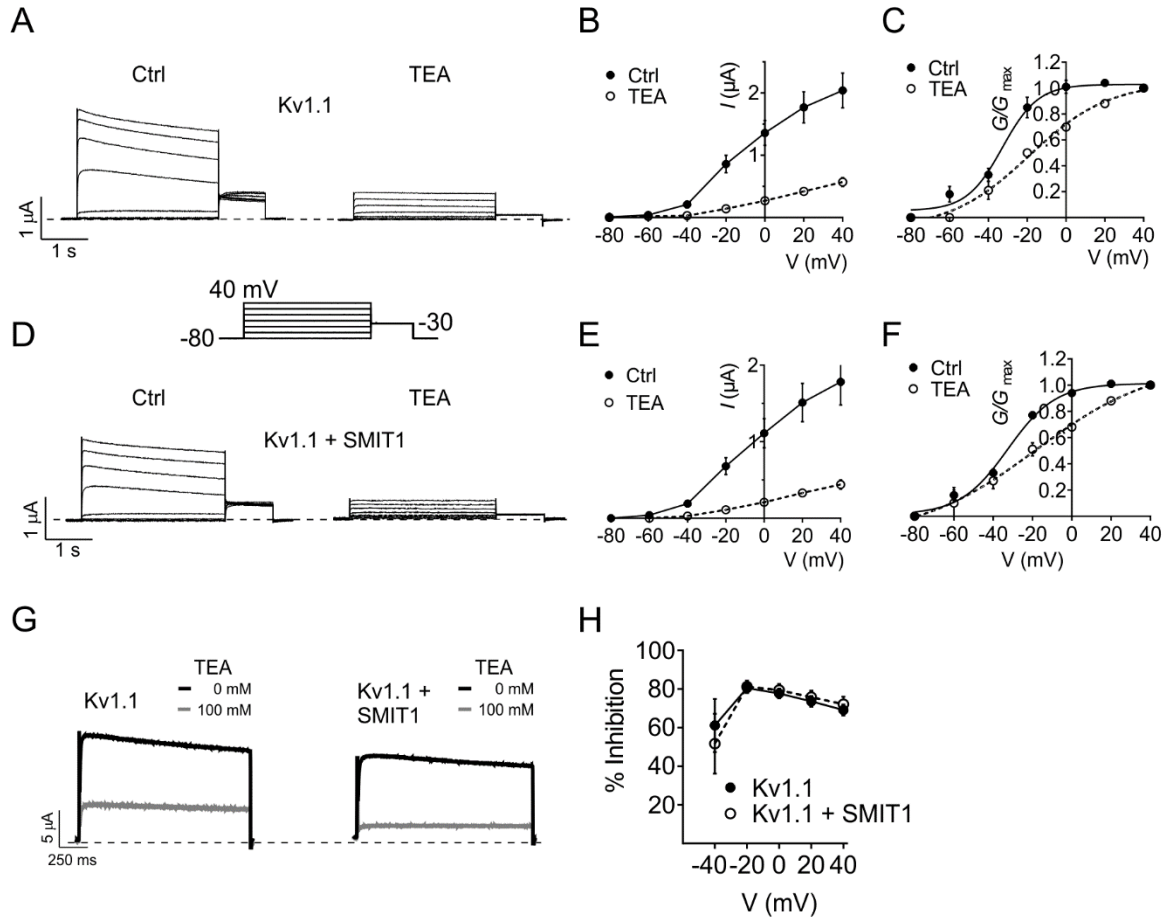

### Supplementary Figure 8. SMIT1 does not protect Kv1.1 from TEA block

**A.** Representative traces from two-electrode voltage-clamp recordings of *Xenopus laevis* oocytes injected with cRNA encoding Kv1.1, in bath ND96 or 100 mM TEA,  $n = 13$ . Voltage protocol inset: 3 s pulse to voltages between -80 and 40 mV followed by a 1 s -30 mV tail pulse. Error bars indicate SEM.

**B.** Mean current-voltage relationships for Kv1.1 recordings as in panel A,  $n = 13$ . Error bars indicate SEM.

**C.** Mean normalized tail current (at -30 mV) versus prepulse potential for Kv1.1 recordings as in panel A,  $n = 13$ . Error bars indicate SEM.

**D.** Representative traces from two-electrode voltage-clamp recordings of *Xenopus laevis* oocytes injected with cRNAs encoding Kv1.1 and SMIT1 in bath ND96 or 100 mM TEA,  $n = 8$ , using voltage protocol as in panel A. Error bars indicate SEM.

**E.** Mean current-voltage relationship for Kv1.1 and SMIT1 cRNA-injected oocytes as in panel D,  $n = 8$ . Error bars indicate SEM.

**F.** Mean normalized tail current (at -30 mV) versus prepulse potential for oocytes as in panel D,  $n = 8$ . Error bars indicate SEM.

**G.** Representative traces recorded at 0 mV for Kv1.1 with or without SMIT1 in 0 mM (black) versus 100 mM (gray) bath TEA,  $n = 8-13$ .

**H.** Mean % inhibition (100 mM bath TEA) versus voltage for Kv1.1 with or without SMIT1 (S1);  $n = 8-13$ . Error bars indicate SEM.

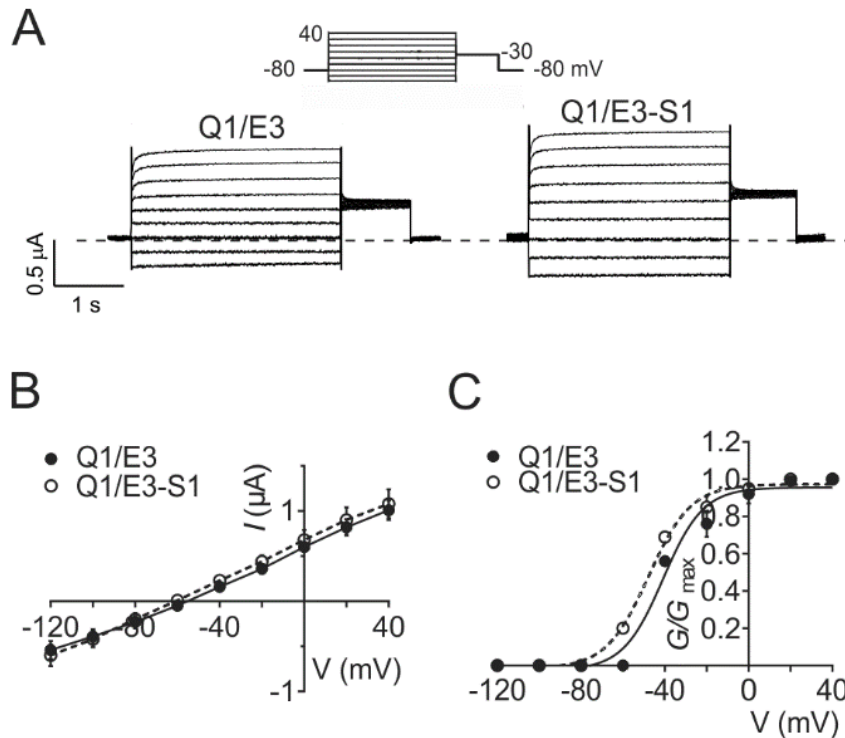

**Supplementary Figure 9. SMIT1 negative-shifts KCNQ1/KCNE3 activation**

A. Representative traces from two-electrode voltage-clamp recordings of *Xenopus laevis* oocytes injected with cRNA encoding KCNQ1/KCNE3, alone or co-injected with cRNA encoding SMIT1,  $n = 15$ .

B. Mean current-voltage relationship for subunit combinations as in panel A,  $n = 15$ . Error bars indicate SEM.

C. Mean normalized tail current (at  $-30$  mV) versus prepulse potential for oocytes as in panel A,  $n = 15$ . Error bars indicate SEM.

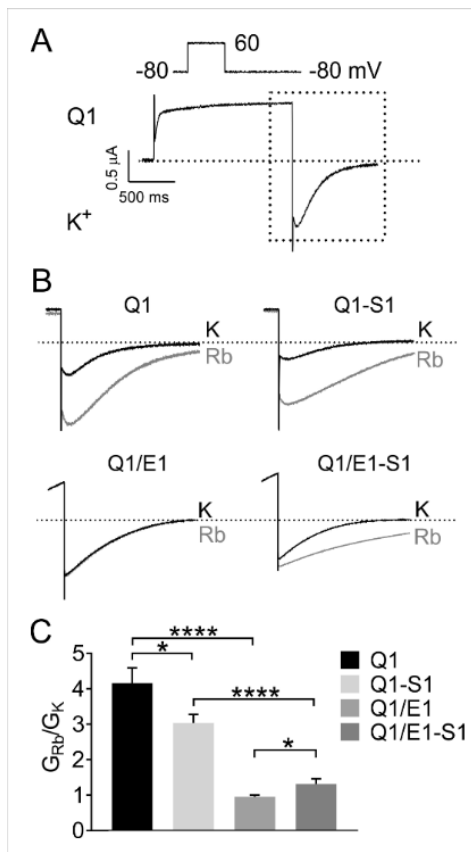

**Supplementary Figure 10. SMIT1 alters KCNQ1 and KCNQ1/KCNE1  $G_{Rb}/G_K$  permeability ratio**

- A.** Representative trace from two-electrode voltage-clamp recordings of *Xenopus laevis* oocytes injected with cRNA encoding KCNQ1 (Q1) in 100 mM  $K^+$  (voltage protocol inset. 1 s pulse to 60 mV followed by a 500-ms -80 mV tail pulse).
- B.** Exemplar traces of tail currents recorded in 100 mM  $[K^+]$  followed by 100 mM  $[Rb^+]$  in the same oocyte for KCNQ1 (Q1) ( $n = 12$ ), KCNQ1/SMIT1 (Q1-S1) ( $n = 18$ ), KCNQ1/KCNE1 (Q1/E1) ( $n = 20$ ), and KCNQ1/KCNE1/SMIT1 (Q1/E1-S1) ( $n = 16$ ) (protocol inset). The  $G_{Rb}/G_K$  ratio was calculated by dividing the peak/plateau amplitude of the respective tail currents by the driving force (difference between -80 mV, and the equilibrium potential for  $K^+$  or  $Rb^+$  ions).
- C.** Mean  $G_{Rb}/G_K$  values calculated from traces as in panel B; \*p<0.05; \*\*\*\*p<0.0001.

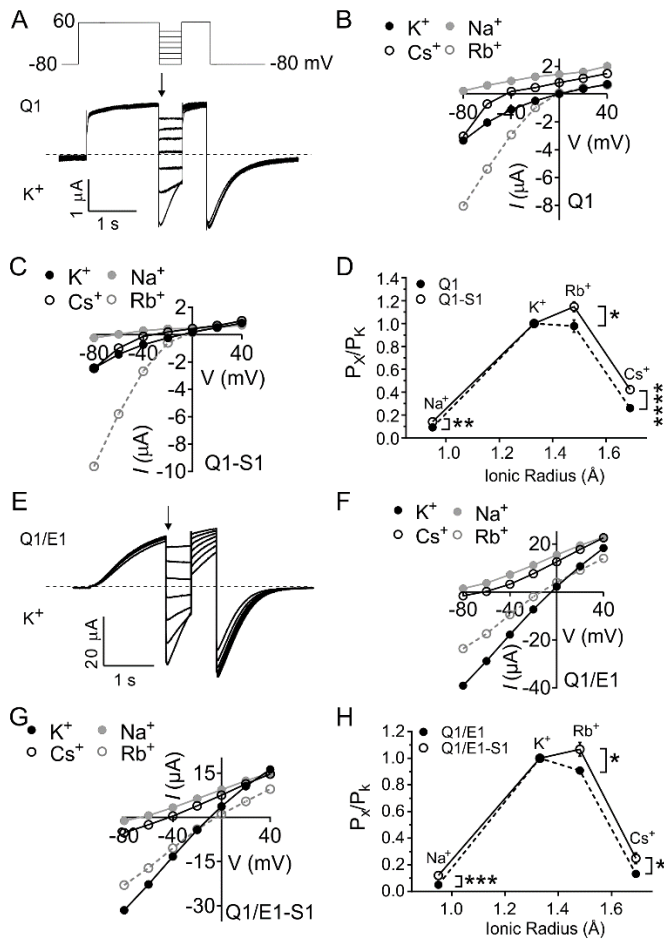

### Supplementary Figure 11. SMIT1 alters KCNQ1 and KCNQ1/KCNE1 ion selectivity

A. Representative trace from two-electrode voltage-clamp recordings of *Xenopus laevis* oocytes injected with cRNA encoding KCNQ1 (Q1) in 100 mM K<sup>+</sup> (voltage protocol inset. 1 s pulse to 60 mV followed by a 500-ms inactivation recovery step to voltages between -80 and 40 mV, then a 500-ms -80 mV tail pulse).

B. Mean current-voltage relationship for KCNQ1 (Q1) alone in 100 mM K<sup>+</sup> (black circles), Cs<sup>+</sup> (open circles) and Na<sup>+</sup> (grey circles),  $n = 8$ .

C. Mean current-voltage relationship for KCNQ1-SMIT1 (Q1-S1) in 100 mM K<sup>+</sup> (black circles), Cs<sup>+</sup> (open circles) and Na<sup>+</sup> (grey circles),  $n = 12$ .

D. Estimated mean permeability relative to that of K<sup>+</sup> versus ionic radius (Pauling) for Na<sup>+</sup>, Rb<sup>+</sup>, and Cs<sup>+</sup> through KCNQ1 (solid circles) and KCNQ1/SMIT1 (open circles, dotted lines) channels,  $n = 8-12$ . Error bars indicate SEM. Statistical significance for comparison of relative permeability of Na<sup>+</sup>: \*\* $p < 0.05$ , Rb<sup>+</sup> \* $p < 0.05$ , and Cs<sup>+</sup> \*\*\*\* $p < 0.0001$ . Values for relative permeability ratios, in the order Na<sup>+</sup>, Rb<sup>+</sup>, and Cs<sup>+</sup>: KCNQ1, 0.11, 0.98, 0.3, and KCNQ1/SMIT1, 0.09, 1.15, and 0.42.

E. Representative trace from two-electrode voltage-clamp recordings of *Xenopus laevis* oocytes injected with cRNA encoding KCNQ1/KCNE1 (Q1/E1) in 100 mM K<sup>+</sup> (voltage protocol as in panel D).

F. Mean current-voltage relationship for KCNQ1/KCNE1 (Q1/E1) in 100 mM K<sup>+</sup> (black circles), Cs<sup>+</sup> (open circles) and Na<sup>+</sup> (grey circles),  $n = 6$ .

G. Mean current-voltage relationship for KCNQ1/KCNE1-SMIT1 (Q1/E1-S1) in 100 mM K<sup>+</sup> (black circles), Cs<sup>+</sup> (open circles) and Na<sup>+</sup> (grey circles),  $n = 10$ .

H. Estimated mean permeability relative to that of K<sup>+</sup> versus ionic radius (Pauling) for Na<sup>+</sup>, Rb<sup>+</sup>, and Cs<sup>+</sup> through KCNQ1/KCNE1 (solid circles) and KCNQ1/KCNE1/SMIT1 (open circles, dotted lines) channels,  $n = 6-10$ . Error bars indicate SEM. Statistical significance for comparison of relative permeability of Na<sup>+</sup>: \*\*\* $p < 0.05$ , Rb<sup>+</sup> \* $p < 0.05$ , and Cs<sup>+</sup> \* $p < 0.05$ . Values for relative permeability ratios, in the order Na<sup>+</sup>, Rb<sup>+</sup>, and Cs<sup>+</sup>: KCNQ1/KCNE1, 0.05, 0.91, and 0.13, and KCNQ1/KCNE1/SMIT1, 0.12, 1.1, and 0.25.

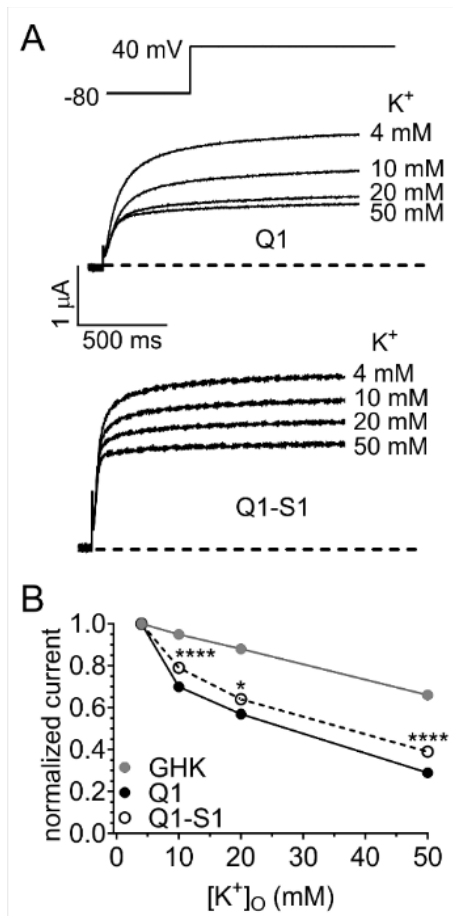

**Supplementary Figure 12. SMIT1 partially protects KCNQ1 from the inhibitory effects of high extracellular K<sup>+</sup>**

**A.** Representative traces from two-electrode voltage-clamp recordings of *Xenopus laevis* oocytes injected with cRNA encoding KCNQ1, +/- SMIT1 in 4, 10, 20 and 50 mM K<sup>+</sup> (voltage protocol inset. 1 s pulse to 60 mV).

**B.** Relative steady-state current amplitude as a function of potassium concentration as measured experimentally for KCNQ1 (filled circles, black line)  $n = 8$ , KCNQ1+SMIT1 (open circles, dotted line)  $n = 8$ , and theoretical values calculated from the GHK flux equation (filled circles, grey line). The currents are normalized to the current measured in 4 mM [K<sup>+</sup>]<sub>o</sub>. \*\*\*\* $p < 0.0001$ , \* $p < 0.05$ .

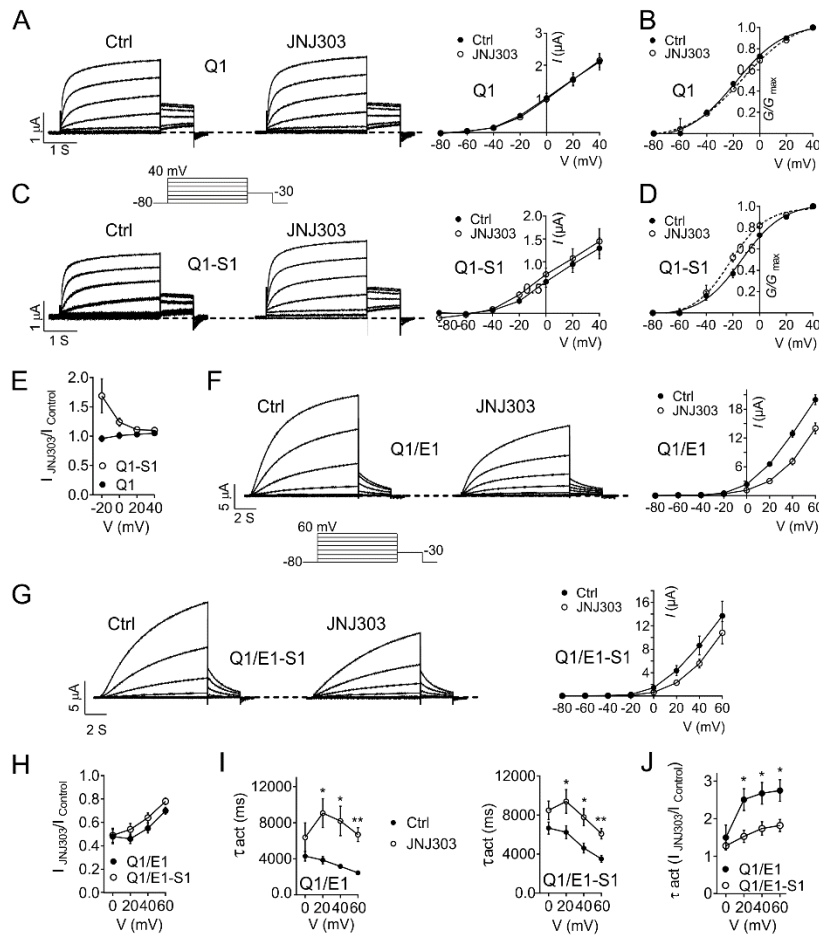

### Supplementary Figure 13. KCNQ1 and KCNQ1/KCNE1, +/- SMIT1 pharmacology: JNJ303

**A.** *Left*, Representative traces; *right*, Mean current-voltage relationship, from two-electrode voltage-clamp recordings of *Xenopus laevis* oocytes expressing KCNQ1 (Q1) in ND96 or 1  $\mu$ M JNJ303,  $n = 7$ . Voltage protocol (inset), 3 s pulse to voltages between -80 and 40 mV followed by a 1 s -30 mV tail pulse. Error bars indicate SEM.

**B.** Mean normalized tail current (at -30 mV) versus prepulse potential for oocytes as in panel A,  $n = 7$ . Error bars indicate SEM.

**C.** *Left*, Representative traces; *right*, Mean current-voltage relationship, from two-electrode voltage-clamp recordings of *Xenopus laevis* oocytes expressing KCNQ1-SMIT1 (Q1-S1) in ND96 or 1  $\mu$ M JNJ303,  $n = 7$ . Voltage protocol as in A. Error bars indicate SEM.

**D.** Mean normalized tail current (at -30 mV) versus prepulse potential for oocytes as in panel C,  $n = 7$ . Error bars indicate SEM.

**E.** Voltage dependence of mean effects, on Q1 versus Q1-S1 current, of 1  $\mu$ M JNJ303, quantified from traces as in A and C,  $n = 7$ , error bars indicate SEM.

**F.** *Left*, representative traces; *right*, mean current-voltage relationship, from two-electrode voltage-clamp recordings of *Xenopus laevis* oocytes expressing KCNQ1/KCNE1 (Q1/E1) in ND96 or 1  $\mu$ M JNJ303,  $n = 7$ . Voltage protocol inset. Error bars indicate SEM.

**G.** *Left*, representative traces; *right*, mean current-voltage relationship, from two-electrode voltage-clamp recordings of *Xenopus laevis* oocytes expressing KCNQ1/KCNE1-SMIT1 (Q1/E1-S1) in ND96 or 1  $\mu$ M JNJ303,  $n = 7$ . Voltage protocol as in panel F.

**H.** Voltage dependence of mean effects, on Q1/E1 versus Q1/E1-S1 current, of 1  $\mu$ M JNJ303, quantified from traces as in F and G,  $n = 7$ , error bars indicate SEM.

**I.** Voltage dependence of mean effects, on Q1/E1 versus Q1/E1-S1 activation rate, of 1  $\mu$ M JNJ303, quantified from traces as in F and G,  $n = 7$ , error bars indicate SEM.

**J.** Effect of SMIT1 (S1) on Q1/E1 activation slowing by 1  $\mu$ M JNJ303, quantified from values in panel I,  $n = 7$ , error bars indicate SEM.
